# Supplementary material for: Localization of Canine Brachycephaly Using an Across Breed Mapping Approach
Source: PLoS One. 2010 Mar 10;5(3):e9632. doi: 10.1371/journal.pone.0009632 (PMC2835769; doi:10.1371/journal.pone.0009632)
Supplement: Table S2 — (0.03 MB XLS) [file pone.0009632.s002.xls]

## Sheet: Sheet1
	Number	Breed
Chondrodysplastic	10	Basset Hound
	11	Dachshund
	8	Pekingese
	10	Pembroke Welsh Corgi
Non-chondrodsyplastic	6	Afghan
	4	Akita
	10	Boxer
	10	Doberman
	10	Eurasier
	10	German Shorthair Pointer
	10	Leonburger
	9	Mastiff
	10	Neopolitan mastiff
	10	Rottweiler
	10	Saluki
Brachycephalic	10	Boxer
	8	Pekingese
	10	Pug
Non-brachycephalic	6	Afghan Hound
	4	Akita
	10	Basenji
	10	Basset Hound
	10	Dachshund
	10	Eurasier
	10	German Shorthair Pointer
	10	Greyhound
	10	Leonberger
	10	Pembroke Welsh Corgi
	10	Poodle
	10	Saluki
	10	Tibetan Terrier
